# Supplementary material for: DNA damage in tissue-resident macrophages leads to age-related neurodegeneration
Source: Research Square preprint supplement (doi:10.21203/rs.3.rs-1059819/v1), 2021-12-01
Supplement: Supplementary file 1 [file 3894bbb1becc41dcd91e492f.docx]

DNA damage in tissue-resident macrophages leads to age-related neurodegeneration

Katerina Gkirtzimanaki**et al.,**

**Supplementary information**

**Supplementary figure legends**

**Supplementary Figure S1**.(**A**). Activation status of freshly isolated microglia from *Er1*F/+ stimulated with LPS and *Er1*Cx/- mice littermates. The histogram overlays MHCII and CD86 expression in MHCII+CD86+ cells.(**B**). Western blot analysis of normative CD45 and β-tubulin expression levels in whole cell lysates from 6-months old *Er1*F/+ and *Er1*Cx/- cerebella (n=3) and cortices (n=3) (as indicated).

**Supplementary Figure S2**.(**A**).ImmunostainingforLC3 and LaminB1 in freshly isolated microglial cells derived from 6-months old *Er1*CX/- and *Er1*F/+ brains. The graph depicts the percentage (%) of cells with reorganized LaminB1 (**B**).Immunostainingfor pATM and p62/SQTM1 in freshly isolated microglial cells of 6-motnhs old *Er1*CX/- and *Er1*F/+ brains. The graph depicts the percentage (%) of *Er1*CX/- or *Er1*F/+ cells with cytoplasmic DAPI+ P62+ chromatin structures. (**C**). FACS analysis of pSTING intracellular levels and CD11bmembrane expression on brain cells derived from the cerebella of 2- and 24-months naturally aged mice (n=3). Statistical analysis indicated no significant differences. The asterisk “*” indicates a p-value ≤ 0.05, two-tailed Student’s t-test.

**Supplementary Figure S3**.(**A**).Western blot analysis of myelin basic protein (MBP) and β-tubulin expression levels in whole cell lysates derived from the 6-months old *Er1*F/+ and *Er1*Cx/- cortices, optical nerves (OP.N.), cerebella and hippocampi (as indicated). The graph depicts the protein band intensity ratios of MPB to β-tubulin. (**B**). Myelin fluorescent staining (FluoroMyelin Red) of sagittal brain sections from the cerebellum of 6-months old *Er1*F/+ and *Er1*Cx/- mice. The graph depicts the density percentage (%) of fluoromyelin intensity as measured in the brains (cerebellum and corpus callosum) of n=4 animals. Statistical analysis indicated no significant differences. The asterisk “*” indicates a p-value ≤ 0.05, two-tailed Student’s t-test.

**Supplementary Figure S4**.(**A**).Representative FACS plots of Annexin V-Propidium Iodide (PI) scatter of CD11b+ gated cells derived from 6-months old *Er1*F/+ (up)and *Er1*Cx/- (down) brains. The graph depicts the percentage (%) of Annexin V+PI+microglia (n=4). (**B**). FACS analysis for IFNAR, NeuN and MAC1/CD11b in freshly isolated brain single cell suspensions of *Er1*F/+ and *Er1*CX/- cerebella (CER), cortices (CTX) and hippocampi (HIP) (as indicated). The histogram depicts the representative overlay of γH2AX fluorescence intensity distribution in CD11b or NeuN cell populations in the 6-months old *Er1*CX/- and *Er1*F/+ brains. The plots depict the distribution of IFNAR+ cell distribution between microglia (CD11b) and neurons (NeuN) in 6 months old brains. Statistical analysis indicated no significant differences. The asterisk “*” indicates a p-value ≤ 0.05, two-tailed Student’s t-test. N.s.: non-significant.

**Supplementary Figure S5**.(**A**).Quantitative PCR evaluation of the mRNA levels of interferon signature genes in the brain lysates of6-months old *Er1*F/+ and *Er1*CX/- cerebella (CER), cortices (CTX) and hippocampi (HIP) (as indicated; RFU: relative fluorescent units; n=3). Statistical analysis indicated no significant differences. The asterisk “*” indicates a p-value ≤ 0.05, two-tailed Student’s t-test.

**Supplementary Figure S6**.(**A**). Scanning electron microscopy image of a cluster of sucrose gradient-isolated EVs (up) and their energy-dispersive-X ray spectra depicting the elemental analysis of limed EVs (yellow spectrum) compared to surrounding liming materials.

**Supplementary Figure S7**.(**A**). Schematic representation of the experimental setup used for simultaneous 3p-F and 2p-F imaging microscopy. (**B**). The DAPI is excited using 3p - absorption, while the dyes Alexa Fluor 488 (or PKH67) and Alexa Fluor 555 were excited using 2p-absorption. (**C**). Fluorescence emission spectrums of the dyes DAPI, Alexa Fluor 488 (or PKH67) and Alexa Fluor 555 and their corresponding detected spectral regions by our three PMTs.

**Supplementary Video file 1**. The video file depicts the 6-months old *Er1F*/- animals that extend and shake their hind limbs to maintain balance when they are suspended by their tails.

**Supplementary Video file 2**.The video file depicts the 6-months old *Er1*Cx/- mice that keep their hind limbs in a clasped position and walk with a wide gait compared to age-matched littermate control animals when they are suspended by their tails.
