# Supplementary material for: DNA damage in tissue-resident macrophages leads to age-related neurodegeneration
Source: Research Square preprint supplement (doi:10.21203/rs.3.rs-1059819/v1), 2021-12-01
Supplement: Supplementary file 1 [file 76174bbbff29ea88cd4b3020.pdf]

## Reporting Summary

Nature Portfolio wishes to improve the reproducibility of the work that we publish. This form provides structure for consistency and transparency in reporting. For further information on Nature Portfolio policies, see our [Editorial Policies](#) and the [Editorial Policy Checklist](#).

### Statistics

For all statistical analyses, confirm that the following items are present in the figure legend, table legend, main text, or Methods section.

n/a Confirmed

- |                                     |                                     |                                                                                                                                                                                                                                                            |
|-------------------------------------|-------------------------------------|------------------------------------------------------------------------------------------------------------------------------------------------------------------------------------------------------------------------------------------------------------|
| <input type="checkbox"/>            | <input checked="" type="checkbox"/> | The exact sample size ( $n$ ) for each experimental group/condition, given as a discrete number and unit of measurement                                                                                                                                    |
| <input type="checkbox"/>            | <input checked="" type="checkbox"/> | A statement on whether measurements were taken from distinct samples or whether the same sample was measured repeatedly                                                                                                                                    |
| <input type="checkbox"/>            | <input checked="" type="checkbox"/> | The statistical test(s) used AND whether they are one- or two-sided<br><i>Only common tests should be described solely by name; describe more complex techniques in the Methods section.</i>                                                               |
| <input checked="" type="checkbox"/> | <input type="checkbox"/>            | A description of all covariates tested                                                                                                                                                                                                                     |
| <input checked="" type="checkbox"/> | <input type="checkbox"/>            | A description of any assumptions or corrections, such as tests of normality and adjustment for multiple comparisons                                                                                                                                        |
| <input type="checkbox"/>            | <input checked="" type="checkbox"/> | A full description of the statistical parameters including central tendency (e.g. means) or other basic estimates (e.g. regression coefficient) AND variation (e.g. standard deviation) or associated estimates of uncertainty (e.g. confidence intervals) |
| <input checked="" type="checkbox"/> | <input type="checkbox"/>            | For null hypothesis testing, the test statistic (e.g. $F$ , $t$ , $r$ ) with confidence intervals, effect sizes, degrees of freedom and $P$ value noted<br><i>Give <math>P</math> values as exact values whenever suitable.</i>                            |
| <input checked="" type="checkbox"/> | <input type="checkbox"/>            | For Bayesian analysis, information on the choice of priors and Markov chain Monte Carlo settings                                                                                                                                                           |
| <input checked="" type="checkbox"/> | <input type="checkbox"/>            | For hierarchical and complex designs, identification of the appropriate level for tests and full reporting of outcomes                                                                                                                                     |
| <input checked="" type="checkbox"/> | <input type="checkbox"/>            | Estimates of effect sizes (e.g. Cohen's $d$ , Pearson's $r$ ), indicating how they were calculated                                                                                                                                                         |

*Our web collection on [statistics for biologists](#) contains articles on many of the points above.*

### Software and code

Policy information about [availability of computer code](#)

**Data collection** *Provide a description of all commercial, open source and custom code used to collect the data in this study, specifying the version used OR state that no software was used.*

**Data analysis** *Provide a description of all commercial, open source and custom code used to analyse the data in this study, specifying the version used OR state that no software was used.*

For manuscripts utilizing custom algorithms or software that are central to the research but not yet described in published literature, software must be made available to editors and reviewers. We strongly encourage code deposition in a community repository (e.g. GitHub). See the Nature Portfolio [guidelines for submitting code & software](#) for further information.

### Data

Policy information about [availability of data](#)

All manuscripts must include a [data availability statement](#). This statement should provide the following information, where applicable:

- Accession codes, unique identifiers, or web links for publicly available datasets
- A description of any restrictions on data availability
- For clinical datasets or third party data, please ensure that the statement adheres to our [policy](#)

All data generated during this study are included in the published article (and its supplementary information files). All data and reagents are available from the authors upon reasonable request.

## Field-specific reporting

Please select the one below that is the best fit for your research. If you are not sure, read the appropriate sections before making your selection.

☒ Life sciences ☐ Behavioural & social sciences ☐ Ecological, evolutionary & environmental sciences

For a reference copy of the document with all sections, see [nature.com/documents/nr-reporting-summary-flat.pdf](https://www.nature.com/documents/nr-reporting-summary-flat.pdf)

## Life sciences study design

All studies must disclose on these points even when the disclosure is negative.

|                 |                                                                                                                                                                                                                                                                                   |
|-----------------|-----------------------------------------------------------------------------------------------------------------------------------------------------------------------------------------------------------------------------------------------------------------------------------|
| Sample size     | Sample size calculation was based on 1. effect size (the difference between the mean of two groups), 2. the standard deviation or standard error of the mean variability within the sample and 3. the decision of direction of effect (two tailed for all experiments performed). |
| Data exclusions | No data were excluded from the analysis.                                                                                                                                                                                                                                          |
| Replication     | All experiments were reproduced > 3 times (biological replicates) and in multiple technical replicates (at least 3 technical replicates).                                                                                                                                         |
| Randomization   | Samples were allocated to experimental groups according to genotypes or treatments.                                                                                                                                                                                               |
| Blinding        | Investigators were not blinded to group allocations for all experiments performed in this work. This is due to the fact that the animal models used in this work have obvious phenotypes.                                                                                         |

## Reporting for specific materials, systems and methods

We require information from authors about some types of materials, experimental systems and methods used in many studies. Here, indicate whether each material, system or method listed is relevant to your study. If you are not sure if a list item applies to your research, read the appropriate section before selecting a response.

### Materials & experimental systems

| n/a                                 | Involved in the study                                           |
|-------------------------------------|-----------------------------------------------------------------|
| <input type="checkbox"/>            | <input checked="" type="checkbox"/> Antibodies                  |
| <input type="checkbox"/>            | <input checked="" type="checkbox"/> Eukaryotic cell lines       |
| <input checked="" type="checkbox"/> | <input type="checkbox"/> Palaeontology and archaeology          |
| <input type="checkbox"/>            | <input checked="" type="checkbox"/> Animals and other organisms |
| <input checked="" type="checkbox"/> | <input type="checkbox"/> Human research participants            |
| <input checked="" type="checkbox"/> | <input type="checkbox"/> Clinical data                          |
| <input checked="" type="checkbox"/> | <input type="checkbox"/> Dual use research of concern           |

### Methods

| n/a                                 | Involved in the study                              |
|-------------------------------------|----------------------------------------------------|
| <input checked="" type="checkbox"/> | <input type="checkbox"/> ChIP-seq                  |
| <input type="checkbox"/>            | <input checked="" type="checkbox"/> Flow cytometry |
| <input checked="" type="checkbox"/> | <input type="checkbox"/> MRI-based neuroimaging    |

## Antibodies

|                 |                                                                                                                                                                                                                                                                                                                                                                                                                                                                                                                                                                                                                                                                                                                                                                                                                                                                                                                                                                                                                                                                                                                                                                                                                                                                                                                                                                                                                                                                                                                                                                                                                                                                               |
|-----------------|-------------------------------------------------------------------------------------------------------------------------------------------------------------------------------------------------------------------------------------------------------------------------------------------------------------------------------------------------------------------------------------------------------------------------------------------------------------------------------------------------------------------------------------------------------------------------------------------------------------------------------------------------------------------------------------------------------------------------------------------------------------------------------------------------------------------------------------------------------------------------------------------------------------------------------------------------------------------------------------------------------------------------------------------------------------------------------------------------------------------------------------------------------------------------------------------------------------------------------------------------------------------------------------------------------------------------------------------------------------------------------------------------------------------------------------------------------------------------------------------------------------------------------------------------------------------------------------------------------------------------------------------------------------------------------|
| Antibodies used | Antibodies against: LC3 (C-9, WB:1:500, IF: 1:500), Ercc1 (D-10, WB:1:500, IF: 1:50), LaminB1 (ab16048, WB:1:1000), p62 (SQSTM1, MBLPM045, WB:1:5000, IF:1:1000) and goat anti-rat IgG-CFL 647 (sc-362293, IF: 1:500) were from Santa Cruz Biotechnology. $\gamma$ -H2A.X (05-636, IF: 1:12000) and pATM (05-740, IF: 1:100) were from Millipore. b-tubulin (ab6046, WB:1:1000), $\gamma$ -H2A.X (ab22551, WB: 1:1000), Ercc1 (ab129267, IF: 1:150) and calbindin (ab108404, IF: 1:150) were from Abcam. Alix (#2171, WB: 1:500), pSTING (#72971, WB: 1:1000), STING (136475, WB: 1:1000), CD81 (10037, WB: 1:1000) and Cleaved Caspase-3 (#9661, IF-IC: 1:300, IHC-F: 1:200) were from Cell Signaling Technology. Calbindin (C9848, IF: 1:500) was from Sigma Aldrich. CD45 (H5A5, IF: 1:200) and Mac1 (M1/70.15.11.5.2, IF: 1:200) were from Developmental Studies Hybridoma Bank (DSHB). PKH67 Green Fluorescent Cell Linker Midi Kit (MIDI67) was from Sigma Aldrich. NeuN (26975-1-Ap, IF: 1:50-1:500) was from Proteintech. MBP1 (IF: 1:200) was from Serotec. Fluoromyelin (F34652, IF: 1:300) was from Molecular probes. $\beta$ -adaplin gr(PA1-1066, WB, IF: 2 $\mu$ g/ml), Goat anti-Mouse IgG (H+L) Cross-Adsorbed Secondary Antibody, Alexa Fluor 488 (A-11001, IF: 1:500), Goat anti-Mouse IgG (H+L) Cross-Adsorbed Secondary Antibody, Alexa Fluor 555 (A-21422, IF:1:500), Donkey anti-Rabbit IgG (H+L) Highly Cross-Adsorbed Secondary Antibody, Alexa Fluor 488 (A-21206, IF:1:500), Goat anti-Rabbit IgG (H+L) Highly Cross-Adsorbed Secondary Antibody, Alexa Fluor 555 (A-27039, IF:1:500) and DAPI (62247, IF:1:500) were from ThermoFisher/Invitrogen. |
| Validation      | The validation of all primary antibodies was based on available references in the manuscript and information provided on the manufacturer website and associated literature.                                                                                                                                                                                                                                                                                                                                                                                                                                                                                                                                                                                                                                                                                                                                                                                                                                                                                                                                                                                                                                                                                                                                                                                                                                                                                                                                                                                                                                                                                                  |

## Eukaryotic cell lines

Policy information about [cell lines](#)

|                     |                                                                                                             |
|---------------------|-------------------------------------------------------------------------------------------------------------|
| Cell line source(s) | All primary cells were derived from NER mutant or wild-type animal models (as indicated in the manuscript). |
|---------------------|-------------------------------------------------------------------------------------------------------------|

|                                                                      |                                                                                                                   |
|----------------------------------------------------------------------|-------------------------------------------------------------------------------------------------------------------|
| Authentication                                                       | The genotype of primary cells was authenticated by PCR and/or sequencing and western blotting (when appropriate). |
| Mycoplasma contamination                                             | All primary cells were tested negative for mycoplasma.                                                            |
| Commonly misidentified lines<br>(See <a href="#">ICLAC</a> register) | We have not used any misidentified lines in this manuscript.                                                      |

## Animals and other organisms

Policy information about [studies involving animals](#): [ARRIVE guidelines](#) recommended for reporting animal research

|                         |                                                                   |
|-------------------------|-------------------------------------------------------------------|
| Laboratory animals      | Mus musculus; strain: Bl/6; sex: males or females (as indicated). |
| Wild animals            | There was no use of wild animals.                                 |
| Field-collected samples | There is no work with field-collected samples.                    |
| Ethics oversight        | Foundation of Research and Technology Hellas                      |

Note that full information on the approval of the study protocol must also be provided in the manuscript.

## Flow Cytometry

### Plots

Confirm that:

- ☒ The axis labels state the marker and fluorochrome used (e.g. CD4-FITC).
- ☒ The axis scales are clearly visible. Include numbers along axes only for bottom left plot of group (a 'group' is an analysis of identical markers).
- ☒ All plots are contour plots with outliers or pseudocolor plots.
- ☒ A numerical value for number of cells or percentage (with statistics) is provided.

### Methodology

|                           |                                                                                                                                                                                                                                                                                                                                                                                                                                                                                                                                                                                                                                                                                                                                                                |
|---------------------------|----------------------------------------------------------------------------------------------------------------------------------------------------------------------------------------------------------------------------------------------------------------------------------------------------------------------------------------------------------------------------------------------------------------------------------------------------------------------------------------------------------------------------------------------------------------------------------------------------------------------------------------------------------------------------------------------------------------------------------------------------------------|
| Sample preparation        | Cells and EVs from Er1Cx/- and Er1F/+ animals were isolated and stained with fluorochrome conjugated antibodies for 20 min at 4°C in PBS/5% FBS. Antibodies used were: anti-Ly6C (128007, clone HK1.4), anti-IFNAR (Invitrogen, clone MAR1-5A3), anti-CD11b (101212, 101208, clone M1/70), anti-MHCII (107606, clone M5/114.15.2) and anti-CD86 (105026, clone GL-1). For intracellular staining, cells were permeabilized and stained using the True-Nuclear Transcription Factor Buffer Set (424401, BioLegend). Secondary antibodies used were: anti-mouse IgG, PerCP (FO114) conjugated goat F(ab)2 and Alexa Fluor 488 (A-11001). Live cells were also stained for Annexin V/PI using the FITC Annexin V Apoptosis Detection Kit (556547, BD Pharmingen). |
| Instrument                | Samples were acquired on a FACS Calibur (BD Biosciences).                                                                                                                                                                                                                                                                                                                                                                                                                                                                                                                                                                                                                                                                                                      |
| Software                  | Data were analyzed using the FlowJo software (Tree Star).                                                                                                                                                                                                                                                                                                                                                                                                                                                                                                                                                                                                                                                                                                      |
| Cell population abundance | Post-sort fractions are not included in the work.                                                                                                                                                                                                                                                                                                                                                                                                                                                                                                                                                                                                                                                                                                              |
| Gating strategy           | FSC SSC scatter was gated for live cells (those on axes were excluded as cell debris or cell clusters). Positive staining was considered that of MFI more or equal to $10^4$ . In all cases, the same number of events (for cells or EVs) were acquired from all samples tested per experiment.                                                                                                                                                                                                                                                                                                                                                                                                                                                                |

☐ Tick this box to confirm that a figure exemplifying the gating strategy is provided in the Supplementary Information.
